# Supplementary material for: Monilinia fructicola Response to White Light
Source: MDPI journal article supplement (doi:10.3390/jof9100988), 2023-10-04

Supplementary Table S1. qPCR primers used in this study.

| Gene name  | Primer ID | 5'-3' Sequence          | Reference                     |
|------------|-----------|-------------------------|-------------------------------|
| Histone H3 | MIH3F     | TCCGTCGTTACCAAAAGTCG    | Rodríguez-Pires et al. (2020) |
|            | MIH3R     | GGCGAGTTGGATGTCCTTAG    |                               |
| MFCVVD1    | Mfcvvd1F  | ATTGCAGATTCCTACAACAGCC  | This study                    |
|            | Mfcvvd1R  | GCTTGAAATCCGACCACATAAT  |                               |
| MFCFAR1    | Mfcfar1F  | GGCTCTGGTAGTACCTCCACCC  | This study                    |
|            | Mfcfar1R  | TCCACATAGATCCCACAAACCC  |                               |
| MFCCRY1    | Mfcry1F   | CAATAGAGGAAGAGGTGGTGGAG | This study                    |
|            | Mfcry1R   | TTCCAGTTCGCAACTCCCTTC   |                               |
| MFCCRY2    | Mcry2F    | TGGGCTTTATTGATGCCTCG    | This study                    |
|            | Mcry2R    | CCTGCAACATATTGCCAATTACC |                               |
| MFCPHY1    | Mphy1F    | GGAGAAGAATGTGCAAGTGCCTA | This study                    |
|            | Mphy1R    | CGTTCGACAAGAGAGGCTGATAC |                               |
| MFCPHY2    | Mphy2F    | ATGGTCAAGGGCGATGCTACT   | This study                    |
|            | Mphy2R    | GGCCAACACCGAGAGTCTCTC   |                               |
| MFCOP1     | Mop1F     | TCTTCGCTGCTTACCACAACG   | This study                    |
|            | Mop1R     | ACCTCAGAATCAACCGACCATG  |                               |
| MFCOP2     | Mop2F     | CTAGCCAAGATTGGCTTCGGT   | This study                    |
|            | Mop2R     | ATCGTTGGCAGGATTATTCGAG  |                               |
| MFCVEL2    | Mvel2F    | CCAACTCATCGTGCTCCGTC    | This study                    |
|            | Mvel2R    | CCTCGGCTACCATCCTTTCC    |                               |
| MFCVEL4    | Mvel4F    | TGCCGACTTGTCGGTTCG      | This study                    |
|            | Mvel4R    | TTGGCTAACAAGAGATTTGGCC  |                               |

Supplementary Table S2. Differentially expressed genes shared between samples from 5 minutes and 14h of illumination.

| Upregulated genes |                                                  | Downregulated genes |                                      |
|-------------------|--------------------------------------------------|---------------------|--------------------------------------|
| Protein ID        | Annotation                                       | Protein ID          | Annotation                           |
| MFRU_003g00560    | pnl1                                             | MFRU_003g05160      | hypothetical protein MFRU_003g05160  |
| MFRU_021g00620    | far1                                             | MFRU_028g00860      | Oxidoreductases                      |
| MFRU_008g01270    | HAD-superfamily class IIA hydrolase              | MFRU_053g00330      | Oxidoreductases                      |
| MFRU_003g04280    | Unknown function                                 | MFRU_036g00470      | putative exo-beta glucanase protein  |
| MFRU_002g03330    | beta-sandwich domain of Sec23/24                 | MFRU_006g02210      | Acting on a peroxide as acceptor     |
| MFRU_071g00010    | Choline dehydrogenase                            | MFRU_028g00160      | putative epl1 protein                |
| MFRU_005g02620    | SUR7                                             | MFRU_008g03590      | Translocases                         |
| MFRU_003g01680    | Cinnamyl alcohol dehydrogenases (CAD)            | MFRU_032g00410      | putative cnd3 protein                |
| MFRU_031g00840    | Taurine catabolism dioxygenase TauD              | MFRU_050g00430      | putative multicopper oxidase protein |
| MFRU_005g04180    | Unknown function                                 |                     |                                      |
| MFRU_071g00130    | Unknown function                                 |                     |                                      |
| MFRU_014g01250    | Unknown function                                 |                     |                                      |
| MFRU_063g00080    | Taurine catabolism dioxygenase TauD              |                     |                                      |
| MFRU_004g03450    | Heat shock protein 9/12                          |                     |                                      |
| MFRU_008g00380    | Unknown function                                 |                     |                                      |
| MFRU_005g01380    | Major Facilitator Superfamily                    |                     |                                      |
| MFRU_019g00940    | pg6                                              |                     |                                      |
| MFRU_028g01080    | Lactonase, 7-bladed                              |                     |                                      |
| MFRU_037g00110    | putative magnesium ion transporter protein       |                     |                                      |
| MFRU_003g02440    | cel1                                             |                     |                                      |
| MFRU_013g00700    | Unknown function                                 |                     |                                      |
| MFRU_012g02510    | putative alkyl hydroperoxide reductase subunit c |                     |                                      |
| MFRU_031g01060    | putative xenobiotic compound family protein      |                     |                                      |
| MFRU_009g02400    | putative zinc-binding dehydrogenase protein      |                     |                                      |
| MFRU_012g01220    | putative histidine acid phosphatase protein      |                     |                                      |
| MFRU_029g00280    | D-threo-aldose 1-dehydrogenase                   |                     |                                      |
| MFRU_004g04290    | Unknown function                                 |                     |                                      |
| MFRU_002g03840    | Unknown function                                 |                     |                                      |
| MFRU_003g00720    | Transferring one-carbon groups                   |                     |                                      |
| MFRU_024g00750    | putative integral membrane protein               |                     |                                      |
| MFRU_010g02220    | Oxidoreductases                                  |                     |                                      |
| MFRU_036g00130    | Acting on ester bonds                            |                     |                                      |
| MFRU_019g01430    | putative major royal jelly protein               |                     |                                      |

Supplementary Figure S1. Light wave composition of used light sources

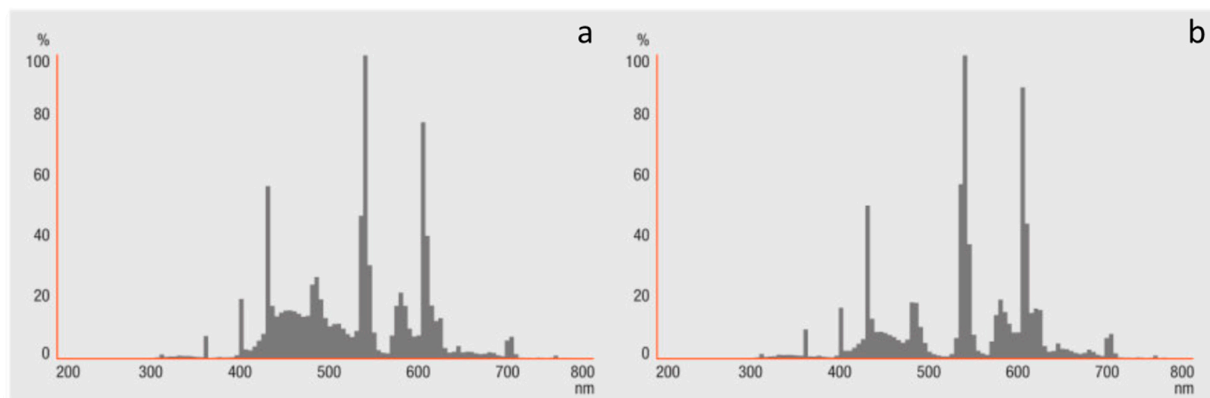

(a) Osram36W/954 “daylight”, (b) Osram 58W/840 “Cool White”.

Supplementary Figure S2. Relative abundance of species encoding a Far1-like protein within Pezizomycotina classes.

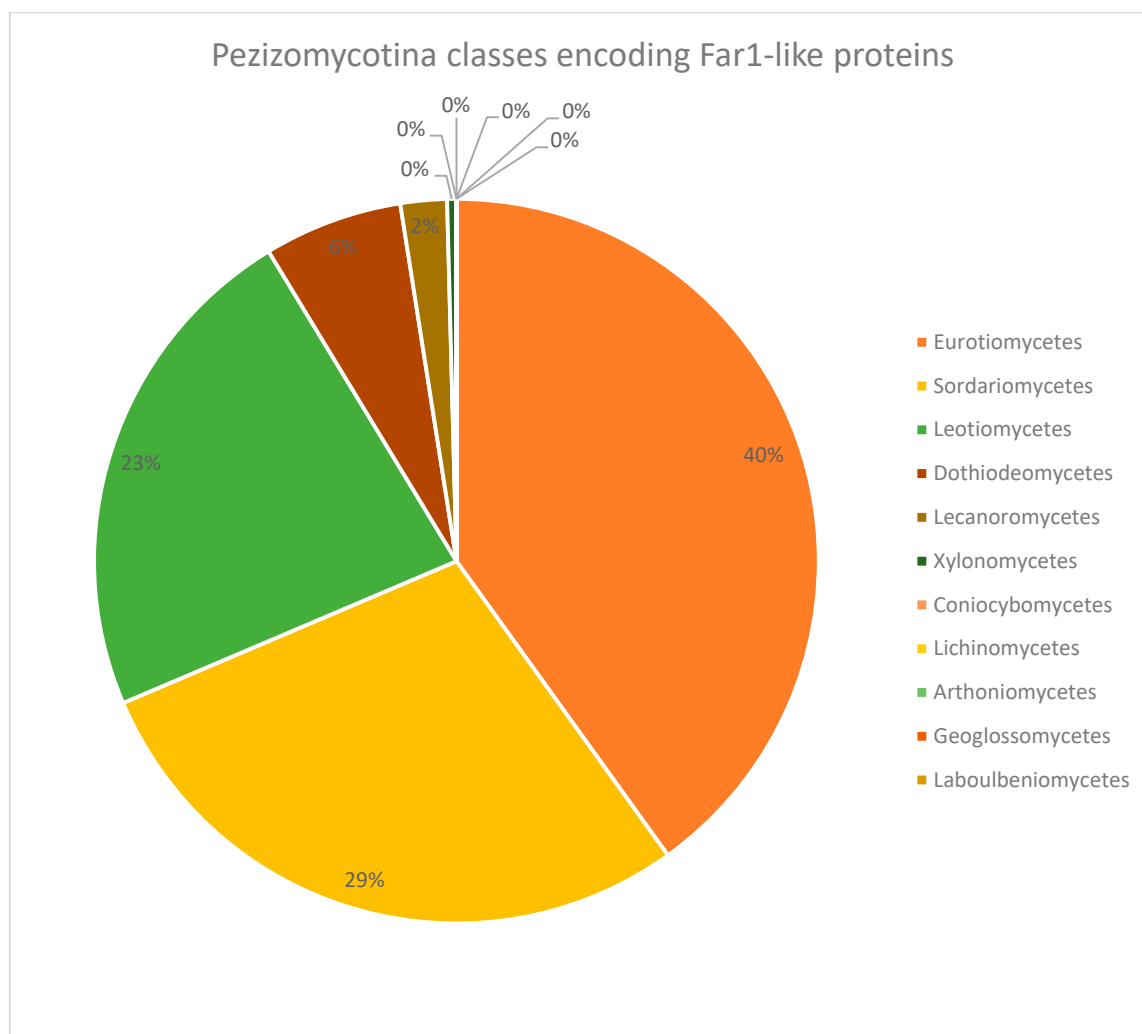

Supplement: s1 [file s1]
